# Supplementary material for: RNA-seq analysis of Drosophila clock and non-clock neurons reveals neuron-specific cycling and novel candidate neuropeptides
Source: PubMed Central journal article supplement (PMC5325595; doi:10.1371/journal.pgen.1006613), 2017-02-09
Supplement: pgen.1006613.s005.pdf [file pgen.1006613.s005.pdf]

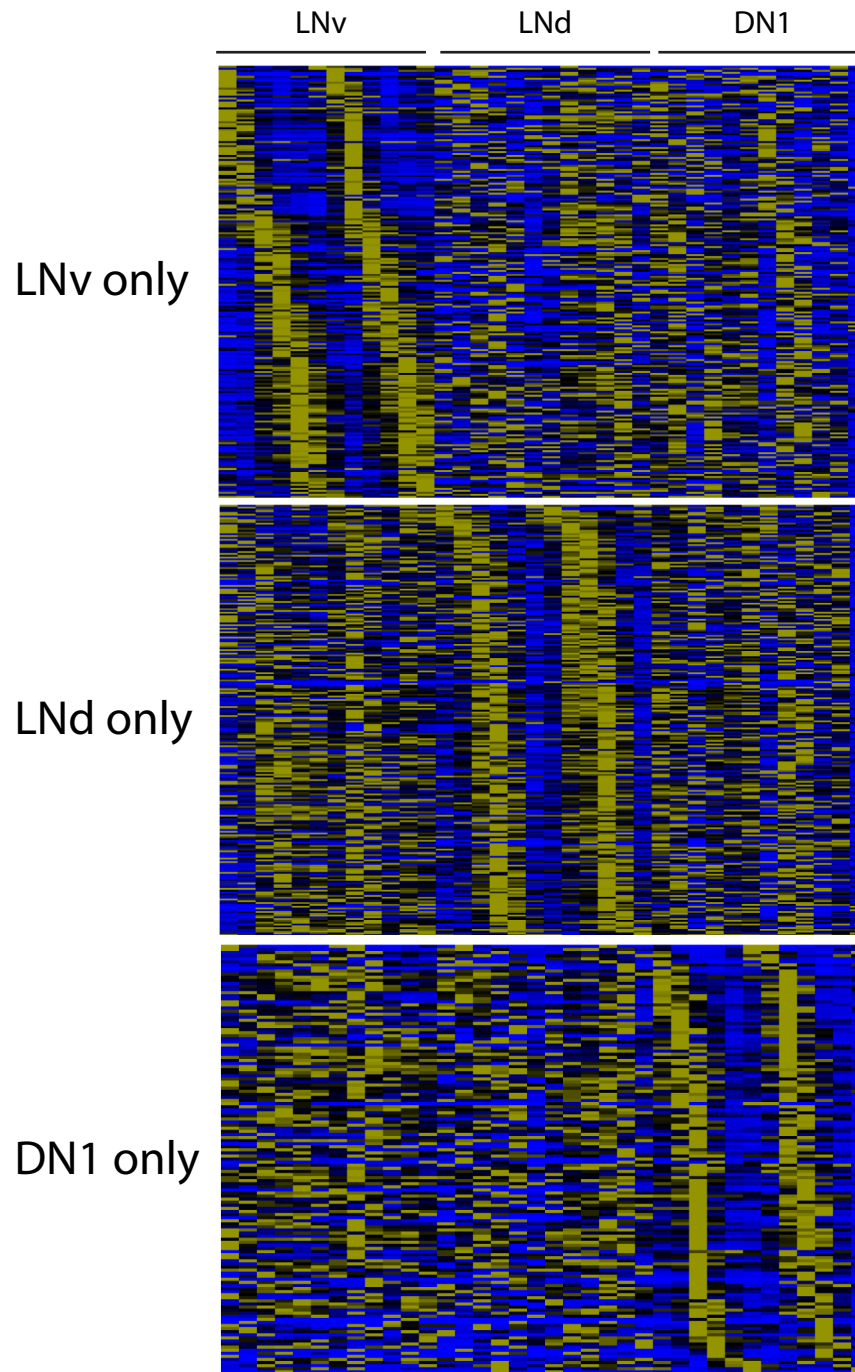

**Supporting Figure 2. Heatmap representing expression patterns of transcripts found to be cycling in one group of circadian neurons.** The expression values for transcripts found to be cycling in one subset of the circadian neurons are represented using a heatmap. Cycling is clear in one set of circadian neurons and absent in the others. Low values are shown in blue (less than 30% of maximum signal), mid values are shown in black (between 30 and 60% of maximum signal) and high values are shown in yellow (greater than 70% of maximum signal).
