# Supplementary material for: RNA-seq analysis of Drosophila clock and non-clock neurons reveals neuron-specific cycling and novel candidate neuropeptides
Source: PubMed Central journal article supplement (PMC5325595; doi:10.1371/journal.pgen.1006613), 2017-02-09
Supplement: pgen.1006613.s007.pdf [file pgen.1006613.s007.pdf]

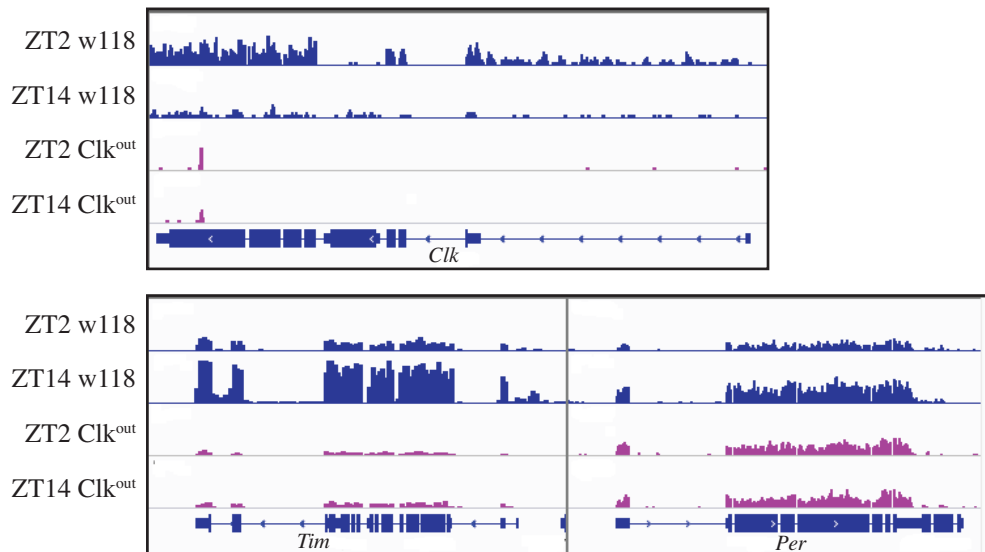

**Supporting Figure 4. Low levels of *tim* and *per* transcripts are detected via brain RNA seq from *Clk*<sup>out</sup> flies.** Brain RNA-seq libraries were made from both wild-type (w118) and *Clk* deletion (*Clk*<sup>out</sup>) flies. The resulting data is shown using the Integrated genome viewer (IGV). *Clk* transcripts are high at ZT2 and low at ZT14 in w118 flies, and not detectable in *Clk*<sup>out</sup> flies (top). *Tim* and *Per* transcripts are low at ZT2 and high at ZT14 in w118 brains (as expected). Interestingly, both *tim* and *per* transcripts are still detectable at low levels (similar to that observed at ZT2 in w118 flies) in *Clk*<sup>out</sup>.
