# Supplementary material for: RNA-seq analysis of Drosophila clock and non-clock neurons reveals neuron-specific cycling and novel candidate neuropeptides
Source: PubMed Central journal article supplement (PMC5325595; doi:10.1371/journal.pgen.1006613), 2017-02-09
Supplement: pgen.1006613.s008.pdf [file pgen.1006613.s008.pdf]

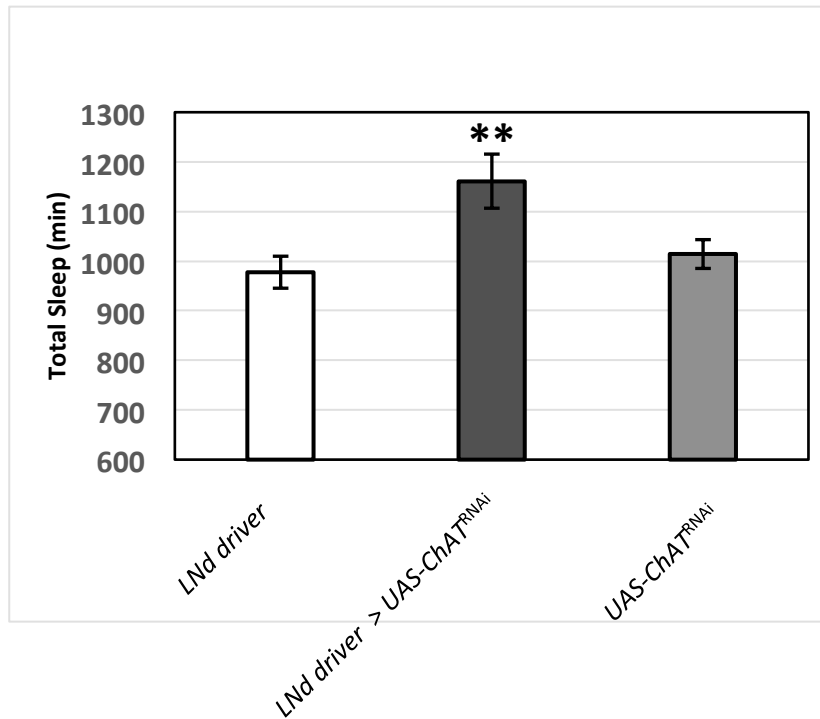

**Supporting Figure 5. *ChAT* expression in the LNds is important for sleep**

**suppression.** Transcripts encoding choline acetyltransferase (*ChAT*) are enriched in LNds. Knockdown of *ChAT* transcripts specifically in the LNds (*Dv-PDF-GAL4*, *pdfgal80*; *pdfgal80* driver) using RNAi results in an increase in total sleep (black). This increase is statistically significant ( $p$ -value  $<0.05$  by one-way Anova) compared to both the driver only control (white) and the RNAi only control (gray).  $n=16$  for all genotypes.
